# Supplementary material
Source: publisher figshare collection journal article supplement (https://acs.figshare.com/ndownloader/files/4589857)
Supplement: Supplementary file 1 [file 4589857]

data_global
#====================================================================

# 1. SUBMISSION DETAILS

_publ_contact_author             'James H. Rigby'
_publ_contact_author_address     
; Department of Chemistry
Wayne State University
5101 Cass Ave.
Detroit, Michigan 48202
U.S.A.
;

_publ_contact_author_phone       '313 577 3097'
_publ_contact_author_email       jhr@chem.wayne.edu
_publ_requested_journal          'Organic Letters'
_publ_contact_letter             
;
Dear Sir or Madam:
Please consider this CIF as a supplmentary data for a manuscript
submitted to Organic Letters.
;
#=================================================================

# 2. PROCESSING SUMMARY (IUCr Office Use Only)

_journal_coden_ASTM              ?
_journal_year                    ?
_journal_volume                  ?
_journal_issue                   ?
_journal_page_first              ?
_journal_page_last               ?

_journal_suppl_publ_number       ?
_journal_suppl_publ_pages        ?

#=======================================================

# 3. TITLE AND AUTHOR LIST

_publ_section_title              
;	Chromium(0)-promoted [6pi+2pi] cycloadditions
	of allenes with cycloheptatriene 
;

loop_
_publ_author_name
_publ_author_address
'James H. Rigby'
;	Department of Chemistry
	Wayne State University
	Detroit, Michigan 48202
	USA
;
'Stephane B. Laurent'
;	Department of Chemistry
	Wayne State University
	Detroit, Michigan 48202
	USA
;
'Zeeshan Kamal'
;	Department of Chemistry
	Wayne State University
	Detroit, Michigan 48202
	USA
;
'Mary Jane Heeg'
;	Department of Chemistry
	Wayne State University
	Detroit, Michigan 48202
	USA
;
#===

  
data_hste 
  
_audit_creation_method            SHELXL-97 
_chemical_name_systematic 
; 
 ? 
; 
_chemical_name_common             ? 
_chemical_melting_point           ? 
_chemical_formula_moiety          ? 
_chemical_formula_sum 
 'C24 H21 N O4' 
_chemical_formula_weight          387.42 
  
loop_ 
 _atom_type_symbol 
 _atom_type_description 
 _atom_type_scat_dispersion_real 
 _atom_type_scat_dispersion_imag 
 _atom_type_scat_source 
 'C'  'C'   0.0033   0.0016 
 'International Tables Vol C Tables 4.2.6.8 and 6.1.1.4' 
 'H'  'H'   0.0000   0.0000 
 'International Tables Vol C Tables 4.2.6.8 and 6.1.1.4' 
 'N'  'N'   0.0061   0.0033 
 'International Tables Vol C Tables 4.2.6.8 and 6.1.1.4' 
 'O'  'O'   0.0106   0.0060 
 'International Tables Vol C Tables 4.2.6.8 and 6.1.1.4' 
  
_symmetry_cell_setting            monoclinic 
_symmetry_space_group_name_H-M    'P21/c' 
  
loop_ 
 _symmetry_equiv_pos_as_xyz 
 'x, y, z' 
 '-x, y+1/2, -z+1/2' 
 '-x, -y, -z' 
 'x, -y-1/2, z-1/2' 
  
_cell_length_a                    21.6415(15) 
_cell_length_b                    7.7284(5) 
_cell_length_c                    11.7898(8) 
_cell_angle_alpha                 90.00 
_cell_angle_beta                  102.402(4) 
_cell_angle_gamma                 90.00 
_cell_volume                      1925.9(2) 
_cell_formula_units_Z             4 
_cell_measurement_temperature     100(2) 
_cell_measurement_reflns_used     3750 
_cell_measurement_theta_min       2.9 
_cell_measurement_theta_max       25.9 
  
_exptl_crystal_description        'plates' 
_exptl_crystal_colour             'pale yellow' 
_exptl_crystal_size_max           0.29 
_exptl_crystal_size_mid           0.17 
_exptl_crystal_size_min           0.06 
_exptl_crystal_density_meas       ? 
_exptl_crystal_density_diffrn     1.336 
_exptl_crystal_density_method     'not measured' 
_exptl_crystal_F_000              816 
_exptl_absorpt_coefficient_mu     0.091 
_exptl_absorpt_correction_type    Multi-scan 
_exptl_absorpt_correction_T_min   0.9741 
_exptl_absorpt_correction_T_max   0.9946 
_exptl_absorpt_process_details    'SADABS, Sheldrick, 1997' 
  
_exptl_special_details 
; 
 ? 
; 
  
_diffrn_ambient_temperature       100(2) 
_diffrn_radiation_wavelength      0.71073 
_diffrn_radiation_type            MoK\a 
_diffrn_radiation_source          'fine-focus sealed tube' 
_diffrn_radiation_monochromator   graphite 
_diffrn_measurement_device_type   ? 
_diffrn_measurement_method        'Bruker APEX2' 
_diffrn_detector_area_resol_mean  ? 
_diffrn_standards_number          ? 
_diffrn_standards_interval_count  ? 
_diffrn_standards_interval_time   ? 
_diffrn_standards_decay_%         ? 
_diffrn_reflns_number             42496 
_diffrn_reflns_av_R_equivalents   0.0785 
_diffrn_reflns_av_sigmaI/netI     0.0643 
_diffrn_reflns_limit_h_min        -28 
_diffrn_reflns_limit_h_max        28 
_diffrn_reflns_limit_k_min        0 
_diffrn_reflns_limit_k_max        10 
_diffrn_reflns_limit_l_min        0 
_diffrn_reflns_limit_l_max        15 
_diffrn_reflns_theta_min          1.93 
_diffrn_reflns_theta_max          28.40 
_reflns_number_total              4793 
_reflns_number_gt                 3034 
_reflns_threshold_expression      >2sigma(I) 
  
_computing_data_collection        'Bruker APEX2' 
_computing_cell_refinement        'Bruker APEX2' 
_computing_data_reduction         'Bruker APEX2' 
_computing_structure_solution     'SHELXS-97 (Sheldrick, 1990)' 
_computing_structure_refinement   'SHELXL-97 (Sheldrick, 1997)' 
_computing_molecular_graphics     SHELXTL-Plus 
_computing_publication_material   SHELXL-97 
  
_refine_special_details 
; 
 Refinement of F^2^ against ALL reflections.  The weighted R-factor wR and 
 goodness of fit S are based on F^2^, conventional R-factors R are based 
 on F, with F set to zero for negative F^2^. The threshold expression of 
 F^2^ > 2sigma(F^2^) is used only for calculating R-factors(gt) etc. and is 
 not relevant to the choice of reflections for refinement.  R-factors based 
 on F^2^ are statistically about twice as large as those based on F, and R- 
 factors based on ALL data will be even larger. 
; 
  
_refine_ls_structure_factor_coef  Fsqd 
_refine_ls_matrix_type            full 
_refine_ls_weighting_scheme       calc 
_refine_ls_weighting_details 
 'calc w=1/[\s^2^(Fo^2^)+(0.0742P)^2^+0.0000P] where P=(Fo^2^+2Fc^2^)/3' 
_atom_sites_solution_primary      direct 
_atom_sites_solution_secondary    difmap 
_atom_sites_solution_hydrogens    geom 
_refine_ls_hydrogen_treatment     constr 
_refine_ls_extinction_method      none 
_refine_ls_extinction_coef        ? 
_refine_ls_number_reflns          4793 
_refine_ls_number_parameters      262 
_refine_ls_number_restraints      0 
_refine_ls_R_factor_all           0.0996 
_refine_ls_R_factor_gt            0.0515 
_refine_ls_wR_factor_ref          0.1332 
_refine_ls_wR_factor_gt           0.1156 
_refine_ls_goodness_of_fit_ref    0.948 
_refine_ls_restrained_S_all       0.948 
_refine_ls_shift/su_max           0.000 
_refine_ls_shift/su_mean          0.000 
  
loop_ 
 _atom_site_label 
 _atom_site_type_symbol 
 _atom_site_fract_x 
 _atom_site_fract_y 
 _atom_site_fract_z 
 _atom_site_U_iso_or_equiv 
 _atom_site_adp_type 
 _atom_site_occupancy 
 _atom_site_symmetry_multiplicity 
 _atom_site_calc_flag 
 _atom_site_refinement_flags 
 _atom_site_disorder_assembly 
 _atom_site_disorder_group 
C1 C 0.14197(8) 0.6709(2) 0.06244(14) 0.0213(4) Uani 1 1 d . . . 
H1 H 0.0979 0.6238 0.0424 0.026 Uiso 1 1 calc R . . 
C2 C 0.14391(8) 0.8313(2) 0.13482(14) 0.0238(4) Uani 1 1 d . . . 
H2 H 0.1112 0.8431 0.1765 0.029 Uiso 1 1 calc R . . 
C3 C 0.18624(8) 0.9593(2) 0.14752(15) 0.0272(4) Uani 1 1 d . . . 
H3 H 0.1791 1.0512 0.1966 0.033 Uiso 1 1 calc R . . 
C4 C 0.24194(8) 0.9790(2) 0.09705(15) 0.0285(4) Uani 1 1 d . . . 
H4 H 0.2631 1.0871 0.1101 0.034 Uiso 1 1 calc R . . 
C5 C 0.26682(9) 0.8638(3) 0.03484(16) 0.0284(4) Uani 1 1 d . . . 
H5 H 0.3051 0.8960 0.0135 0.034 Uiso 1 1 calc R . . 
C6 C 0.24042(8) 0.6886(2) -0.00486(15) 0.0237(4) Uani 1 1 d . . . 
H6 H 0.2599 0.6481 -0.0697 0.028 Uiso 1 1 calc R . . 
C7 C 0.24960(8) 0.5461(2) 0.09112(14) 0.0217(4) Uani 1 1 d . . . 
H7 H 0.2559 0.4328 0.0544 0.026 Uiso 1 1 calc R . . 
C8 C 0.18683(7) 0.5377(2) 0.13232(14) 0.0197(4) Uani 1 1 d . . . 
C9 C 0.16779(8) 0.6937(2) -0.04777(14) 0.0243(4) Uani 1 1 d . . . 
H9A H 0.1540 0.8056 -0.0858 0.029 Uiso 1 1 calc R . . 
H9B H 0.1532 0.5988 -0.1035 0.029 Uiso 1 1 calc R . . 
C10 C 0.17830(8) 0.4314(2) 0.21734(14) 0.0206(4) Uani 1 1 d . . . 
H10 H 0.2135 0.3585 0.2466 0.025 Uiso 1 1 calc R . . 
C11 C 0.30440(8) 0.5740(3) 0.19309(14) 0.0249(4) Uani 1 1 d . . . 
H11A H 0.2979 0.6811 0.2352 0.030 Uiso 1 1 calc R . . 
H11B H 0.3080 0.4754 0.2477 0.030 Uiso 1 1 calc R . . 
C12 C 0.12457(8) 0.4065(2) 0.27375(14) 0.0194(4) Uani 1 1 d . . . 
C13 C 0.13396(8) 0.2987(2) 0.37159(14) 0.0224(4) Uani 1 1 d . . . 
H13 H 0.1733 0.2404 0.3954 0.027 Uiso 1 1 calc R . . 
C14 C 0.08713(8) 0.2750(2) 0.43466(15) 0.0249(4) Uani 1 1 d . . . 
H14 H 0.0948 0.2017 0.5009 0.030 Uiso 1 1 calc R . . 
C15 C 0.02971(8) 0.3576(2) 0.40119(15) 0.0259(4) Uani 1 1 d . . . 
H15 H -0.0022 0.3422 0.4445 0.031 Uiso 1 1 calc R . . 
C16 C 0.01868(8) 0.4633(2) 0.30398(16) 0.0273(4) Uani 1 1 d . . . 
H16 H -0.0210 0.5195 0.2802 0.033 Uiso 1 1 calc R . . 
C17 C 0.06526(8) 0.4875(2) 0.24143(15) 0.0253(4) Uani 1 1 d . . . 
H17 H 0.0569 0.5606 0.1751 0.030 Uiso 1 1 calc R . . 
O1 O 0.36189(5) 0.58849(16) 0.14697(10) 0.0246(3) Uani 1 1 d . . . 
C18 C 0.41602(8) 0.5841(2) 0.22623(14) 0.0204(4) Uani 1 1 d . . . 
O2 O 0.41948(5) 0.56274(17) 0.32919(10) 0.0258(3) Uani 1 1 d . . . 
C19 C 0.47238(8) 0.6102(2) 0.17375(14) 0.0193(4) Uani 1 1 d . . . 
C20 C 0.53138(8) 0.5595(2) 0.23765(14) 0.0211(4) Uani 1 1 d . . . 
H20 H 0.5344 0.5033 0.3103 0.025 Uiso 1 1 calc R . . 
C21 C 0.58566(8) 0.5900(2) 0.19633(14) 0.0212(4) Uani 1 1 d . . . 
H21 H 0.6259 0.5538 0.2390 0.025 Uiso 1 1 calc R . . 
C22 C 0.57945(8) 0.6744(2) 0.09143(14) 0.0198(4) Uani 1 1 d . . . 
C23 C 0.52151(8) 0.7257(2) 0.02514(14) 0.0216(4) Uani 1 1 d . . . 
H23 H 0.5189 0.7831 -0.0470 0.026 Uiso 1 1 calc R . . 
C24 C 0.46756(8) 0.6914(2) 0.06652(14) 0.0208(4) Uani 1 1 d . . . 
H24 H 0.4272 0.7232 0.0219 0.025 Uiso 1 1 calc R . . 
N1 N 0.63734(7) 0.71606(19) 0.04964(12) 0.0238(3) Uani 1 1 d . . . 
O3 O 0.68867(6) 0.68168(19) 0.11311(11) 0.0315(3) Uani 1 1 d . . . 
O4 O 0.63126(6) 0.78423(19) -0.04598(11) 0.0345(3) Uani 1 1 d . . . 
  
loop_ 
 _atom_site_aniso_label 
 _atom_site_aniso_U_11 
 _atom_site_aniso_U_22 
 _atom_site_aniso_U_33 
 _atom_site_aniso_U_23 
 _atom_site_aniso_U_13 
 _atom_site_aniso_U_12 
C1 0.0201(9) 0.0223(9) 0.0224(9) 0.0025(8) 0.0067(7) -0.0016(7) 
C2 0.0247(9) 0.0250(10) 0.0223(9) 0.0037(8) 0.0062(7) 0.0041(8) 
C3 0.0315(10) 0.0219(10) 0.0283(10) -0.0014(8) 0.0066(8) 0.0028(8) 
C4 0.0278(10) 0.0224(10) 0.0348(11) 0.0028(8) 0.0055(8) -0.0042(8) 
C5 0.0237(10) 0.0303(11) 0.0320(10) 0.0082(9) 0.0077(8) -0.0044(8) 
C6 0.0258(10) 0.0287(10) 0.0190(9) 0.0021(8) 0.0103(7) 0.0001(8) 
C7 0.0228(9) 0.0222(9) 0.0219(9) -0.0001(7) 0.0090(7) 0.0000(7) 
C8 0.0177(9) 0.0208(9) 0.0207(8) -0.0019(7) 0.0044(7) -0.0019(7) 
C9 0.0289(10) 0.0236(9) 0.0195(9) 0.0009(7) 0.0031(7) -0.0004(8) 
C10 0.0197(9) 0.0190(9) 0.0233(9) 0.0007(7) 0.0048(7) 0.0013(7) 
C11 0.0198(9) 0.0337(10) 0.0228(9) 0.0038(8) 0.0085(7) -0.0022(8) 
C12 0.0223(9) 0.0162(8) 0.0202(8) -0.0021(7) 0.0059(7) -0.0030(7) 
C13 0.0219(9) 0.0219(9) 0.0229(9) 0.0000(8) 0.0039(7) 0.0002(7) 
C14 0.0295(10) 0.0259(10) 0.0196(9) 0.0019(8) 0.0060(8) -0.0036(8) 
C15 0.0242(10) 0.0289(10) 0.0268(9) -0.0032(8) 0.0105(8) -0.0058(8) 
C16 0.0189(9) 0.0290(10) 0.0346(10) 0.0031(9) 0.0071(8) -0.0009(8) 
C17 0.0223(9) 0.0267(10) 0.0276(10) 0.0070(8) 0.0067(8) -0.0003(8) 
O1 0.0181(6) 0.0345(7) 0.0225(6) 0.0045(6) 0.0072(5) -0.0023(5) 
C18 0.0227(9) 0.0169(8) 0.0218(9) -0.0007(7) 0.0050(7) -0.0004(7) 
O2 0.0269(7) 0.0320(8) 0.0196(6) 0.0031(6) 0.0075(5) -0.0011(6) 
C19 0.0220(9) 0.0160(8) 0.0208(8) -0.0032(7) 0.0066(7) -0.0011(7) 
C20 0.0259(9) 0.0207(9) 0.0170(8) 0.0006(7) 0.0053(7) 0.0009(8) 
C21 0.0187(9) 0.0240(9) 0.0212(9) -0.0034(8) 0.0046(7) 0.0008(7) 
C22 0.0197(9) 0.0209(9) 0.0211(9) -0.0064(7) 0.0096(7) -0.0040(7) 
C23 0.0253(9) 0.0208(9) 0.0196(8) 0.0005(7) 0.0069(7) -0.0030(7) 
C24 0.0203(9) 0.0218(9) 0.0195(8) -0.0009(7) 0.0026(7) -0.0003(7) 
N1 0.0223(8) 0.0273(8) 0.0234(8) -0.0051(7) 0.0082(6) -0.0037(7) 
O3 0.0193(7) 0.0455(9) 0.0292(7) -0.0033(6) 0.0045(6) -0.0012(6) 
O4 0.0324(7) 0.0470(9) 0.0262(7) 0.0100(7) 0.0111(6) -0.0048(7) 
  
_geom_special_details 
; 
 All esds (except the esd in the dihedral angle between two l.s. planes) 
 are estimated using the full covariance matrix.  The cell esds are taken 
 into account individually in the estimation of esds in distances, angles 
 and torsion angles; correlations between esds in cell parameters are only 
 used when they are defined by crystal symmetry.  An approximate (isotropic) 
 treatment of cell esds is used for estimating esds involving l.s. planes. 
; 
  
loop_ 
 _geom_bond_atom_site_label_1 
 _geom_bond_atom_site_label_2 
 _geom_bond_distance 
 _geom_bond_site_symmetry_2 
 _geom_bond_publ_flag 
C1 C2 1.500(2) . ? 
C1 C8 1.529(2) . ? 
C1 C9 1.531(2) . ? 
C2 C3 1.335(2) . ? 
C3 C4 1.462(2) . ? 
C4 C5 1.338(3) . ? 
C5 C6 1.505(3) . ? 
C6 C9 1.545(2) . ? 
C6 C7 1.561(2) . ? 
C7 C11 1.512(2) . ? 
C7 C8 1.539(2) . ? 
C8 C10 1.339(2) . ? 
C10 C12 1.471(2) . ? 
C11 O1 1.4651(19) . ? 
C12 C13 1.402(2) . ? 
C12 C17 1.405(2) . ? 
C13 C14 1.392(2) . ? 
C14 C15 1.377(2) . ? 
C15 C16 1.386(3) . ? 
C16 C17 1.384(2) . ? 
O1 C18 1.3330(19) . ? 
C18 O2 1.2113(18) . ? 
C18 C19 1.495(2) . ? 
C19 C20 1.392(2) . ? 
C19 C24 1.395(2) . ? 
C20 C21 1.385(2) . ? 
C21 C22 1.379(2) . ? 
C22 C23 1.386(2) . ? 
C22 N1 1.477(2) . ? 
C23 C24 1.384(2) . ? 
N1 O4 1.2256(18) . ? 
N1 O3 1.2279(18) . ? 
  
loop_ 
 _geom_angle_atom_site_label_1 
 _geom_angle_atom_site_label_2 
 _geom_angle_atom_site_label_3 
 _geom_angle 
 _geom_angle_site_symmetry_1 
 _geom_angle_site_symmetry_3 
 _geom_angle_publ_flag 
C2 C1 C8 108.23(14) . . ? 
C2 C1 C9 114.67(15) . . ? 
C8 C1 C9 103.27(13) . . ? 
C3 C2 C1 127.65(16) . . ? 
C2 C3 C4 129.59(17) . . ? 
C5 C4 C3 128.17(18) . . ? 
C4 C5 C6 126.76(17) . . ? 
C5 C6 C9 111.75(15) . . ? 
C5 C6 C7 115.38(14) . . ? 
C9 C6 C7 102.56(13) . . ? 
C11 C7 C8 110.48(13) . . ? 
C11 C7 C6 115.59(14) . . ? 
C8 C7 C6 105.98(13) . . ? 
C10 C8 C1 130.01(15) . . ? 
C10 C8 C7 122.35(15) . . ? 
C1 C8 C7 107.61(13) . . ? 
C1 C9 C6 104.49(13) . . ? 
C8 C10 C12 131.91(16) . . ? 
O1 C11 C7 107.42(13) . . ? 
C13 C12 C17 116.78(15) . . ? 
C13 C12 C10 117.43(15) . . ? 
C17 C12 C10 125.73(15) . . ? 
C14 C13 C12 121.62(16) . . ? 
C15 C14 C13 120.10(16) . . ? 
C14 C15 C16 119.65(16) . . ? 
C17 C16 C15 120.32(17) . . ? 
C16 C17 C12 121.52(16) . . ? 
C18 O1 C11 115.24(12) . . ? 
O2 C18 O1 124.18(15) . . ? 
O2 C18 C19 123.56(15) . . ? 
O1 C18 C19 112.26(13) . . ? 
C20 C19 C24 119.89(15) . . ? 
C20 C19 C18 118.23(14) . . ? 
C24 C19 C18 121.80(15) . . ? 
C21 C20 C19 120.68(15) . . ? 
C22 C21 C20 117.99(16) . . ? 
C21 C22 C23 122.91(15) . . ? 
C21 C22 N1 118.44(15) . . ? 
C23 C22 N1 118.63(15) . . ? 
C24 C23 C22 118.43(15) . . ? 
C23 C24 C19 120.07(16) . . ? 
O4 N1 O3 123.92(14) . . ? 
O4 N1 C22 117.99(14) . . ? 
O3 N1 C22 118.08(14) . . ? 
  
loop_ 
 _geom_torsion_atom_site_label_1 
 _geom_torsion_atom_site_label_2 
 _geom_torsion_atom_site_label_3 
 _geom_torsion_atom_site_label_4 
 _geom_torsion 
 _geom_torsion_site_symmetry_1 
 _geom_torsion_site_symmetry_2 
 _geom_torsion_site_symmetry_3 
 _geom_torsion_site_symmetry_4 
 _geom_torsion_publ_flag 
C8 C1 C2 C3 82.9(2) . . . . ? 
C9 C1 C2 C3 -31.8(2) . . . . ? 
C1 C2 C3 C4 -0.8(3) . . . . ? 
C2 C3 C4 C5 -7.2(3) . . . . ? 
C3 C4 C5 C6 4.3(3) . . . . ? 
C4 C5 C6 C9 41.2(2) . . . . ? 
C4 C5 C6 C7 -75.5(2) . . . . ? 
C5 C6 C7 C11 -24.5(2) . . . . ? 
C9 C6 C7 C11 -146.26(15) . . . . ? 
C5 C6 C7 C8 98.20(17) . . . . ? 
C9 C6 C7 C8 -23.53(17) . . . . ? 
C2 C1 C8 C10 79.8(2) . . . . ? 
C9 C1 C8 C10 -158.24(18) . . . . ? 
C2 C1 C8 C7 -98.33(15) . . . . ? 
C9 C1 C8 C7 23.62(17) . . . . ? 
C11 C7 C8 C10 -52.3(2) . . . . ? 
C6 C7 C8 C10 -178.18(15) . . . . ? 
C11 C7 C8 C1 126.04(15) . . . . ? 
C6 C7 C8 C1 0.13(17) . . . . ? 
C2 C1 C9 C6 78.73(18) . . . . ? 
C8 C1 C9 C6 -38.79(17) . . . . ? 
C5 C6 C9 C1 -85.53(17) . . . . ? 
C7 C6 C9 C1 38.64(17) . . . . ? 
C1 C8 C10 C12 -0.9(3) . . . . ? 
C7 C8 C10 C12 177.00(16) . . . . ? 
C8 C7 C11 O1 -177.50(13) . . . . ? 
C6 C7 C11 O1 -57.19(19) . . . . ? 
C8 C10 C12 C13 -171.86(18) . . . . ? 
C8 C10 C12 C17 5.1(3) . . . . ? 
C17 C12 C13 C14 -0.9(2) . . . . ? 
C10 C12 C13 C14 176.35(15) . . . . ? 
C12 C13 C14 C15 0.3(3) . . . . ? 
C13 C14 C15 C16 0.5(3) . . . . ? 
C14 C15 C16 C17 -0.7(3) . . . . ? 
C15 C16 C17 C12 0.1(3) . . . . ? 
C13 C12 C17 C16 0.7(3) . . . . ? 
C10 C12 C17 C16 -176.32(16) . . . . ? 
C7 C11 O1 C18 -169.10(14) . . . . ? 
C11 O1 C18 O2 3.0(2) . . . . ? 
C11 O1 C18 C19 -176.54(14) . . . . ? 
O2 C18 C19 C20 19.0(2) . . . . ? 
O1 C18 C19 C20 -161.47(15) . . . . ? 
O2 C18 C19 C24 -157.58(17) . . . . ? 
O1 C18 C19 C24 21.9(2) . . . . ? 
C24 C19 C20 C21 0.5(2) . . . . ? 
C18 C19 C20 C21 -176.12(15) . . . . ? 
C19 C20 C21 C22 1.1(3) . . . . ? 
C20 C21 C22 C23 -1.6(3) . . . . ? 
C20 C21 C22 N1 176.72(15) . . . . ? 
C21 C22 C23 C24 0.4(3) . . . . ? 
N1 C22 C23 C24 -177.91(14) . . . . ? 
C22 C23 C24 C19 1.3(2) . . . . ? 
C20 C19 C24 C23 -1.8(2) . . . . ? 
C18 C19 C24 C23 174.77(15) . . . . ? 
C21 C22 N1 O4 176.85(16) . . . . ? 
C23 C22 N1 O4 -4.8(2) . . . . ? 
C21 C22 N1 O3 -3.7(2) . . . . ? 
C23 C22 N1 O3 174.61(15) . . . . ? 
  
_diffrn_measured_fraction_theta_max    0.992 
_diffrn_reflns_theta_full              28.30 
_diffrn_measured_fraction_theta_full   0.998 
_refine_diff_density_max    0.271 
_refine_diff_density_min   -0.226 
_refine_diff_density_rms    0.050 

#===END
 
data_dtep 
  
_audit_creation_method            SHELXL-97 
_chemical_name_systematic 
; 
 ? 
; 
_chemical_name_common             ? 
_chemical_melting_point           ? 
_chemical_formula_moiety          ? 
_chemical_formula_sum 
 'C13 H16 O2' 
_chemical_formula_weight          204.26 
  
loop_ 
 _atom_type_symbol 
 _atom_type_description 
 _atom_type_scat_dispersion_real 
 _atom_type_scat_dispersion_imag 
 _atom_type_scat_source 
 'C'  'C'   0.0033   0.0016 
 'International Tables Vol C Tables 4.2.6.8 and 6.1.1.4' 
 'H'  'H'   0.0000   0.0000 
 'International Tables Vol C Tables 4.2.6.8 and 6.1.1.4' 
 'O'  'O'   0.0106   0.0060 
 'International Tables Vol C Tables 4.2.6.8 and 6.1.1.4' 
  
_symmetry_cell_setting            triclinic 
_symmetry_space_group_name_H-M    'P-1' 
  
loop_ 
 _symmetry_equiv_pos_as_xyz 
 'x, y, z' 
 '-x, -y, -z' 
  
_cell_length_a                    7.4379(2) 
_cell_length_b                    10.6548(3) 
_cell_length_c                    13.3291(4) 
_cell_angle_alpha                 82.488(2) 
_cell_angle_beta                  88.2290(10) 
_cell_angle_gamma                 78.6350(10) 
_cell_volume                      1026.71(5) 
_cell_formula_units_Z             4 
_cell_measurement_temperature     100(2) 
_cell_measurement_reflns_used     5542 
_cell_measurement_theta_min       2.35 
_cell_measurement_theta_max       28.3 
  
_exptl_crystal_description        'fragment' 
_exptl_crystal_colour             'colorless' 
_exptl_crystal_size_max           0.18 
_exptl_crystal_size_mid           0.16 
_exptl_crystal_size_min           0.16 
_exptl_crystal_density_meas       ? 
_exptl_crystal_density_diffrn     1.321 
_exptl_crystal_density_method     'not measured' 
_exptl_crystal_F_000              440 
_exptl_absorpt_coefficient_mu     0.087 
_exptl_absorpt_correction_type    Multi-scan 
_exptl_absorpt_correction_T_min   0.9844 
_exptl_absorpt_correction_T_max   0.9861 
_exptl_absorpt_process_details    'SADABS, Sheldrick, 1997' 
  
_exptl_special_details 
; 
 ? 
; 
  
_diffrn_ambient_temperature       100(2) 
_diffrn_radiation_wavelength      0.71073 
_diffrn_radiation_type            MoK\a 
_diffrn_radiation_source          'fine-focus sealed tube' 
_diffrn_radiation_monochromator   graphite 
_diffrn_measurement_device_type   ? 
_diffrn_measurement_method        'Bruker APEX2' 
_diffrn_detector_area_resol_mean  ? 
_diffrn_standards_number          ? 
_diffrn_standards_interval_count  ? 
_diffrn_standards_interval_time   ? 
_diffrn_standards_decay_%         ? 
_diffrn_reflns_number             21914 
_diffrn_reflns_av_R_equivalents   0.0362 
_diffrn_reflns_av_sigmaI/netI     0.0355 
_diffrn_reflns_limit_h_min        -9 
_diffrn_reflns_limit_h_max        9 
_diffrn_reflns_limit_k_min        -13 
_diffrn_reflns_limit_k_max        14 
_diffrn_reflns_limit_l_min        0 
_diffrn_reflns_limit_l_max        17 
_diffrn_reflns_theta_min          2.34 
_diffrn_reflns_theta_max          28.34 
_reflns_number_total              5061 
_reflns_number_gt                 3982 
_reflns_threshold_expression      >2sigma(I) 
  
_computing_data_collection        'Bruker APEX2' 
_computing_cell_refinement        'Bruker APEX2' 
_computing_data_reduction         'Bruker APEX2' 
_computing_structure_solution     'SHELXS-97 (Sheldrick, 1990)' 
_computing_structure_refinement   'SHELXL-97 (Sheldrick, 1997)' 
_computing_molecular_graphics     SHELXTL-Plus 
_computing_publication_material   SHELXL-97 
  
_refine_special_details 
; 
 Refinement of F^2^ against ALL reflections.  The weighted R-factor wR and 
 goodness of fit S are based on F^2^, conventional R-factors R are based 
 on F, with F set to zero for negative F^2^. The threshold expression of 
 F^2^ > 2sigma(F^2^) is used only for calculating R-factors(gt) etc. and is 
 not relevant to the choice of reflections for refinement.  R-factors based 
 on F^2^ are statistically about twice as large as those based on F, and R- 
 factors based on ALL data will be even larger. 
 The model consists of 2 independent molecules linked by H-bonds in 3-d 
 array. The hydroxy H atoms are disordered such that atoms O2 and O3 each 
 bonds to 2 half-occupancy hydrogens. The O-H bond lengths are held fixed
 at 0.84 A.
 
; 
  
_refine_ls_structure_factor_coef  Fsqd 
_refine_ls_matrix_type            full 
_refine_ls_weighting_scheme       calc 
_refine_ls_weighting_details 
 'calc w=1/[\s^2^(Fo^2^)+(0.0592P)^2^+0.2803P] where P=(Fo^2^+2Fc^2^)/3' 
_atom_sites_solution_primary      direct 
_atom_sites_solution_secondary    difmap 
_atom_sites_solution_hydrogens    geom 
_refine_ls_hydrogen_treatment     mixed 
_refine_ls_extinction_method      none 
_refine_ls_extinction_coef        ? 
_refine_ls_number_reflns          5061 
_refine_ls_number_parameters      291 
_refine_ls_number_restraints      5 
_refine_ls_R_factor_all           0.0580 
_refine_ls_R_factor_gt            0.0427 
_refine_ls_wR_factor_ref          0.1130 
_refine_ls_wR_factor_gt           0.1055 
_refine_ls_goodness_of_fit_ref    1.015 
_refine_ls_restrained_S_all       1.014 
_refine_ls_shift/su_max           0.000 
_refine_ls_shift/su_mean          0.000 
  
loop_ 
 _atom_site_label 
 _atom_site_type_symbol 
 _atom_site_fract_x 
 _atom_site_fract_y 
 _atom_site_fract_z 
 _atom_site_U_iso_or_equiv 
 _atom_site_adp_type 
 _atom_site_occupancy 
 _atom_site_symmetry_multiplicity 
 _atom_site_calc_flag 
 _atom_site_refinement_flags 
 _atom_site_disorder_assembly 
 _atom_site_disorder_group 
O1 O 0.09141(14) 0.38989(9) 0.38133(7) 0.0189(2) Uani 1 1 d D . . 
H1A H -0.0097(14) 0.4386(16) 0.3903(15) 0.046(6) Uiso 1 1 d D . . 
O2 O 0.06537(15) 0.09319(10) 0.03614(8) 0.0253(2) Uani 1 1 d D . . 
H2A H 0.164(3) 0.106(4) 0.008(3) 0.037(11) Uiso 0.50 1 d PD A 1 
H2B H 0.012(5) 0.048(3) 0.004(3) 0.044(12) Uiso 0.50 1 d PD B 2 
C1 C -0.13068(17) 0.26876(12) 0.25010(9) 0.0128(2) Uani 1 1 d . . . 
H1 H -0.1181 0.3597 0.2265 0.015 Uiso 1 1 calc R . . 
C2 C -0.11772(17) 0.23975(12) 0.36574(9) 0.0137(2) Uani 1 1 d . . . 
H2 H -0.2166 0.3010 0.3968 0.016 Uiso 1 1 calc R . . 
C3 C -0.14125(17) 0.10290(12) 0.40007(9) 0.0152(3) Uani 1 1 d . . . 
H3 H -0.1744 0.0795 0.4684 0.018 Uiso 1 1 calc R . . 
C4 C -0.11631(17) 0.01500(12) 0.33643(10) 0.0159(3) Uani 1 1 d . . . 
H4 H -0.1344 -0.0698 0.3595 0.019 Uiso 1 1 calc R . . 
C5 C -0.06034(17) 0.04720(12) 0.22933(9) 0.0142(2) Uani 1 1 d . . . 
H5 H 0.0194 -0.0285 0.2028 0.017 Uiso 1 1 calc R . . 
C6 C -0.20729(17) 0.12276(12) 0.14934(9) 0.0153(3) Uani 1 1 d . . . 
H6 H -0.2810 0.0748 0.1122 0.018 Uiso 1 1 calc R . . 
C7 C -0.04784(18) 0.17912(12) 0.09521(9) 0.0152(3) Uani 1 1 d . . . 
H7 H -0.0855 0.2689 0.0599 0.018 Uiso 1 1 calc R . . 
C8 C 0.02084(17) 0.17215(12) 0.20467(9) 0.0130(2) Uani 1 1 d . . . 
C9 C -0.30289(17) 0.23657(12) 0.20321(10) 0.0153(3) Uani 1 1 d . . . 
H9A H -0.3903 0.2107 0.2557 0.018 Uiso 1 1 calc R . . 
H9B H -0.3667 0.3093 0.1551 0.018 Uiso 1 1 calc R . . 
C10 C 0.21222(17) 0.18302(13) 0.23351(9) 0.0156(3) Uani 1 1 d . . . 
H10A H 0.2404 0.2657 0.2004 0.019 Uiso 1 1 calc R . . 
H10B H 0.3029 0.1118 0.2096 0.019 Uiso 1 1 calc R . . 
C11 C 0.22633(17) 0.17678(12) 0.34753(9) 0.0144(3) Uani 1 1 d . . . 
C12 C 0.07054(17) 0.25711(12) 0.40069(9) 0.0148(3) Uani 1 1 d . . . 
H12 H 0.0816 0.2288 0.4752 0.018 Uiso 1 1 calc R . . 
C13 C 0.36638(18) 0.10304(13) 0.39941(10) 0.0182(3) Uani 1 1 d . . . 
H13A H 0.3699 0.1001 0.4709 0.022 Uiso 1 1 calc R . . 
H13B H 0.4632 0.0532 0.3651 0.022 Uiso 1 1 calc R . . 
O3 O 0.39218(14) 0.11007(9) -0.04565(8) 0.0209(2) Uani 1 1 d D . . 
H3A H 0.466(4) 0.047(2) -0.016(3) 0.033(10) Uiso 0.50 1 d PD C 1 
H3B H 0.289(3) 0.120(4) -0.017(3) 0.053(13) Uiso 0.50 1 d PD D 2 
O4 O 0.21874(14) 0.43250(9) -0.43092(7) 0.0220(2) Uani 1 1 d . . . 
H4A H 0.2110 0.4289 -0.4932 0.026 Uiso 1 1 calc R . . 
C14 C 0.52929(18) 0.20772(12) -0.24569(9) 0.0157(3) Uani 1 1 d . . . 
H14 H 0.4806 0.1263 -0.2425 0.019 Uiso 1 1 calc R . . 
C15 C 0.61005(17) 0.22008(12) -0.14355(9) 0.0158(3) Uani 1 1 d . . . 
H15 H 0.7072 0.1422 -0.1234 0.019 Uiso 1 1 calc R . . 
C16 C 0.69443(18) 0.33904(13) -0.15382(10) 0.0195(3) Uani 1 1 d . . . 
H16 H 0.7864 0.3443 -0.1075 0.023 Uiso 1 1 calc R . . 
C17 C 0.64254(18) 0.43669(13) -0.22649(10) 0.0181(3) Uani 1 1 d . . . 
H17 H 0.6979 0.5104 -0.2313 0.022 Uiso 1 1 calc R . . 
C18 C 0.49785(17) 0.43170(12) -0.30064(9) 0.0145(2) Uani 1 1 d . . . 
H18 H 0.4222 0.5190 -0.3225 0.017 Uiso 1 1 calc R . . 
C19 C 0.55361(19) 0.35220(13) -0.39257(10) 0.0187(3) Uani 1 1 d . . . 
H10 H 0.6025 0.3935 -0.4566 0.022 Uiso 1 1 calc R . . 
C20 C 0.35489(19) 0.32760(13) -0.38751(10) 0.0182(3) Uani 1 1 d . . . 
H20 H 0.3435 0.2420 -0.4070 0.022 Uiso 1 1 calc R . . 
C21 C 0.37685(17) 0.32742(12) -0.27306(9) 0.0141(3) Uani 1 1 d . . . 
C22 C 0.6585(2) 0.22343(13) -0.33918(10) 0.0204(3) Uani 1 1 d . . . 
H22A H 0.7832 0.2295 -0.3191 0.024 Uiso 1 1 calc R . . 
H22B H 0.6663 0.1525 -0.3813 0.024 Uiso 1 1 calc R . . 
C23 C 0.22084(18) 0.33852(13) -0.19706(10) 0.0170(3) Uani 1 1 d . . . 
H23A H 0.1312 0.4196 -0.2157 0.020 Uiso 1 1 calc R . . 
H23B H 0.1570 0.2652 -0.1968 0.020 Uiso 1 1 calc R . . 
C24 C 0.29789(18) 0.33773(12) -0.09328(9) 0.0157(3) Uani 1 1 d . . . 
C25 C 0.45821(18) 0.22932(12) -0.06189(9) 0.0158(3) Uani 1 1 d . . . 
H25 H 0.5101 0.2447 0.0027 0.019 Uiso 1 1 calc R . . 
C26 C 0.2368(2) 0.42778(14) -0.03421(11) 0.0261(3) Uani 1 1 d . . . 
H26A H 0.1399 0.4973 -0.0564 0.031 Uiso 1 1 calc R . . 
H26B H 0.2900 0.4229 0.0304 0.031 Uiso 1 1 calc R . . 
  
loop_ 
 _atom_site_aniso_label 
 _atom_site_aniso_U_11 
 _atom_site_aniso_U_22 
 _atom_site_aniso_U_33 
 _atom_site_aniso_U_23 
 _atom_site_aniso_U_13 
 _atom_site_aniso_U_12 
O1 0.0234(5) 0.0145(5) 0.0197(5) -0.0025(4) -0.0037(4) -0.0050(4) 
O2 0.0280(6) 0.0284(6) 0.0192(5) -0.0102(4) 0.0079(4) -0.0015(5) 
C1 0.0141(6) 0.0121(6) 0.0121(5) -0.0014(4) -0.0020(5) -0.0021(5) 
C2 0.0141(6) 0.0149(6) 0.0116(6) -0.0029(5) 0.0004(5) -0.0009(5) 
C3 0.0124(6) 0.0185(6) 0.0137(6) 0.0023(5) 0.0003(5) -0.0035(5) 
C4 0.0131(6) 0.0144(6) 0.0193(6) 0.0029(5) 0.0002(5) -0.0037(5) 
C5 0.0145(6) 0.0123(6) 0.0156(6) -0.0024(5) -0.0003(5) -0.0021(5) 
C6 0.0154(6) 0.0160(6) 0.0154(6) -0.0042(5) -0.0012(5) -0.0036(5) 
C7 0.0178(6) 0.0150(6) 0.0131(6) -0.0045(5) 0.0016(5) -0.0024(5) 
C8 0.0137(6) 0.0135(6) 0.0123(6) -0.0021(5) 0.0003(5) -0.0035(5) 
C9 0.0145(6) 0.0154(6) 0.0155(6) -0.0025(5) -0.0030(5) -0.0012(5) 
C10 0.0129(6) 0.0189(6) 0.0154(6) -0.0018(5) 0.0003(5) -0.0042(5) 
C11 0.0143(6) 0.0141(6) 0.0162(6) -0.0006(5) -0.0003(5) -0.0069(5) 
C12 0.0182(6) 0.0140(6) 0.0122(6) -0.0002(5) -0.0033(5) -0.0040(5) 
C13 0.0163(6) 0.0194(6) 0.0185(6) -0.0007(5) -0.0016(5) -0.0039(5) 
O3 0.0268(5) 0.0135(5) 0.0220(5) 0.0028(4) -0.0017(4) -0.0056(4) 
O4 0.0272(5) 0.0210(5) 0.0168(5) -0.0016(4) -0.0094(4) -0.0011(4) 
C14 0.0185(6) 0.0121(6) 0.0154(6) -0.0023(5) 0.0009(5) -0.0002(5) 
C15 0.0158(6) 0.0143(6) 0.0160(6) 0.0007(5) -0.0015(5) -0.0009(5) 
C16 0.0169(6) 0.0236(7) 0.0191(6) -0.0006(5) -0.0030(5) -0.0075(5) 
C17 0.0189(6) 0.0187(6) 0.0187(6) -0.0024(5) -0.0007(5) -0.0081(5) 
C18 0.0165(6) 0.0126(6) 0.0141(6) -0.0010(5) -0.0004(5) -0.0027(5) 
C19 0.0234(7) 0.0182(6) 0.0135(6) -0.0027(5) 0.0018(5) -0.0015(5) 
C20 0.0251(7) 0.0137(6) 0.0158(6) -0.0021(5) -0.0058(5) -0.0026(5) 
C21 0.0161(6) 0.0123(6) 0.0142(6) -0.0030(5) -0.0021(5) -0.0022(5) 
C22 0.0240(7) 0.0181(6) 0.0163(6) -0.0030(5) 0.0039(5) 0.0023(5) 
C23 0.0153(6) 0.0150(6) 0.0199(6) 0.0003(5) -0.0012(5) -0.0023(5) 
C24 0.0181(6) 0.0134(6) 0.0149(6) 0.0010(5) 0.0037(5) -0.0034(5) 
C25 0.0193(6) 0.0142(6) 0.0140(6) -0.0010(5) -0.0012(5) -0.0038(5) 
C26 0.0372(8) 0.0191(7) 0.0186(7) -0.0008(5) 0.0050(6) 0.0012(6) 
  
_geom_special_details 
; 
 All esds (except the esd in the dihedral angle between two l.s. planes) 
 are estimated using the full covariance matrix.  The cell esds are taken 
 into account individually in the estimation of esds in distances, angles 
 and torsion angles; correlations between esds in cell parameters are only 
 used when they are defined by crystal symmetry.  An approximate (isotropic) 
 treatment of cell esds is used for estimating esds involving l.s. planes. 
; 
  
loop_ 
 _geom_bond_atom_site_label_1 
 _geom_bond_atom_site_label_2 
 _geom_bond_distance 
 _geom_bond_site_symmetry_2 
 _geom_bond_publ_flag 
O1 C12 1.4425(15) . ? 
O2 C7 1.4180(16) . ? 
C1 C2 1.5341(16) . ? 
C1 C8 1.5362(17) . ? 
C1 C9 1.5581(17) . ? 
C2 C3 1.5124(17) . ? 
C2 C12 1.5417(17) . ? 
C3 C4 1.3269(19) . ? 
C4 C5 1.4900(17) . ? 
C5 C8 1.5606(17) . ? 
C5 C6 1.5749(17) . ? 
C6 C9 1.5323(18) . ? 
C6 C7 1.5500(18) . ? 
C7 C8 1.5485(17) . ? 
C8 C10 1.5158(17) . ? 
C10 C11 1.5184(17) . ? 
C11 C13 1.3268(18) . ? 
C11 C12 1.5147(18) . ? 
O3 C25 1.4387(15) . ? 
O4 C20 1.4250(16) . ? 
C14 C15 1.5363(18) . ? 
C14 C21 1.5425(17) . ? 
C14 C22 1.5619(18) . ? 
C15 C16 1.5106(18) . ? 
C15 C25 1.5421(18) . ? 
C16 C17 1.3307(18) . ? 
C17 C18 1.4967(18) . ? 
C18 C21 1.5641(17) . ? 
C18 C19 1.5787(18) . ? 
C19 C22 1.5345(18) . ? 
C19 C20 1.5492(19) . ? 
C20 C21 1.5389(17) . ? 
C21 C23 1.5137(18) . ? 
C23 C24 1.5120(18) . ? 
C24 C26 1.3230(19) . ? 
C24 C25 1.5142(18) . ? 
  
loop_ 
 _geom_angle_atom_site_label_1 
 _geom_angle_atom_site_label_2 
 _geom_angle_atom_site_label_3 
 _geom_angle 
 _geom_angle_site_symmetry_1 
 _geom_angle_site_symmetry_3 
 _geom_angle_publ_flag 
C2 C1 C8 107.94(10) . . ? 
C2 C1 C9 115.16(10) . . ? 
C8 C1 C9 99.99(9) . . ? 
C3 C2 C1 110.24(10) . . ? 
C3 C2 C12 109.30(10) . . ? 
C1 C2 C12 109.79(10) . . ? 
C4 C3 C2 121.11(11) . . ? 
C3 C4 C5 121.06(11) . . ? 
C4 C5 C8 116.39(10) . . ? 
C4 C5 C6 119.96(11) . . ? 
C8 C5 C6 81.99(9) . . ? 
C9 C6 C7 100.92(10) . . ? 
C9 C6 C5 102.43(10) . . ? 
C7 C6 C5 86.27(9) . . ? 
O2 C7 C8 114.09(11) . . ? 
O2 C7 C6 113.59(10) . . ? 
C8 C7 C6 83.19(9) . . ? 
C10 C8 C1 113.14(10) . . ? 
C10 C8 C7 125.38(10) . . ? 
C1 C8 C7 102.15(10) . . ? 
C10 C8 C5 124.18(10) . . ? 
C1 C8 C5 99.64(9) . . ? 
C7 C8 C5 86.81(9) . . ? 
C6 C9 C1 98.62(10) . . ? 
C8 C10 C11 110.27(10) . . ? 
C13 C11 C12 120.89(12) . . ? 
C13 C11 C10 122.13(12) . . ? 
C12 C11 C10 116.97(10) . . ? 
O1 C12 C11 107.75(10) . . ? 
O1 C12 C2 111.80(10) . . ? 
C11 C12 C2 111.53(10) . . ? 
C15 C14 C21 107.74(10) . . ? 
C15 C14 C22 115.34(11) . . ? 
C21 C14 C22 99.56(10) . . ? 
C16 C15 C14 109.40(10) . . ? 
C16 C15 C25 110.05(11) . . ? 
C14 C15 C25 109.93(10) . . ? 
C17 C16 C15 121.32(12) . . ? 
C16 C17 C18 120.71(12) . . ? 
C17 C18 C21 117.08(10) . . ? 
C17 C18 C19 118.60(11) . . ? 
C21 C18 C19 81.78(9) . . ? 
C22 C19 C20 101.00(11) . . ? 
C22 C19 C18 101.72(10) . . ? 
C20 C19 C18 86.32(10) . . ? 
O4 C20 C21 112.56(11) . . ? 
O4 C20 C19 115.36(11) . . ? 
C21 C20 C19 83.55(9) . . ? 
C23 C21 C20 124.92(11) . . ? 
C23 C21 C14 113.20(10) . . ? 
C20 C21 C14 102.25(10) . . ? 
C23 C21 C18 124.34(11) . . ? 
C20 C21 C18 87.19(9) . . ? 
C14 C21 C18 99.47(10) . . ? 
C19 C22 C14 98.90(10) . . ? 
C24 C23 C21 108.84(10) . . ? 
C26 C24 C23 123.26(12) . . ? 
C26 C24 C25 121.10(12) . . ? 
C23 C24 C25 115.58(11) . . ? 
O3 C25 C24 108.34(10) . . ? 
O3 C25 C15 109.39(10) . . ? 
C24 C25 C15 111.56(10) . . ? 
  
loop_ 
 _geom_torsion_atom_site_label_1 
 _geom_torsion_atom_site_label_2 
 _geom_torsion_atom_site_label_3 
 _geom_torsion_atom_site_label_4 
 _geom_torsion 
 _geom_torsion_site_symmetry_1 
 _geom_torsion_site_symmetry_2 
 _geom_torsion_site_symmetry_3 
 _geom_torsion_site_symmetry_4 
 _geom_torsion_publ_flag 
C8 C1 C2 C3 -59.30(12) . . . . ? 
C9 C1 C2 C3 51.40(14) . . . . ? 
C8 C1 C2 C12 61.17(12) . . . . ? 
C9 C1 C2 C12 171.87(10) . . . . ? 
C1 C2 C3 C4 19.51(16) . . . . ? 
C12 C2 C3 C4 -101.25(13) . . . . ? 
C2 C3 C4 C5 1.30(18) . . . . ? 
C3 C4 C5 C8 17.10(17) . . . . ? 
C3 C4 C5 C6 -79.01(16) . . . . ? 
C4 C5 C6 C9 49.58(14) . . . . ? 
C8 C5 C6 C9 -66.33(10) . . . . ? 
C4 C5 C6 C7 149.95(11) . . . . ? 
C8 C5 C6 C7 34.04(8) . . . . ? 
C9 C6 C7 O2 -178.92(10) . . . . ? 
C5 C6 C7 O2 79.12(11) . . . . ? 
C9 C6 C7 C8 67.72(10) . . . . ? 
C5 C6 C7 C8 -34.23(9) . . . . ? 
C2 C1 C8 C10 -61.59(13) . . . . ? 
C9 C1 C8 C10 177.70(10) . . . . ? 
C2 C1 C8 C7 161.01(10) . . . . ? 
C9 C1 C8 C7 40.30(11) . . . . ? 
C2 C1 C8 C5 72.22(11) . . . . ? 
C9 C1 C8 C5 -48.49(11) . . . . ? 
O2 C7 C8 C10 52.33(17) . . . . ? 
C6 C7 C8 C10 165.16(12) . . . . ? 
O2 C7 C8 C1 -177.44(10) . . . . ? 
C6 C7 C8 C1 -64.61(10) . . . . ? 
O2 C7 C8 C5 -78.26(12) . . . . ? 
C6 C7 C8 C5 34.57(9) . . . . ? 
C4 C5 C8 C10 74.86(15) . . . . ? 
C6 C5 C8 C10 -165.59(12) . . . . ? 
C4 C5 C8 C1 -51.81(13) . . . . ? 
C6 C5 C8 C1 67.74(9) . . . . ? 
C4 C5 C8 C7 -153.60(11) . . . . ? 
C6 C5 C8 C7 -34.05(9) . . . . ? 
C7 C6 C9 C1 -47.45(11) . . . . ? 
C5 C6 C9 C1 41.10(11) . . . . ? 
C2 C1 C9 C6 -111.29(11) . . . . ? 
C8 C1 C9 C6 4.07(11) . . . . ? 
C1 C8 C10 C11 52.11(14) . . . . ? 
C7 C8 C10 C11 177.86(11) . . . . ? 
C5 C8 C10 C11 -68.57(15) . . . . ? 
C8 C10 C11 C13 133.72(13) . . . . ? 
C8 C10 C11 C12 -45.15(14) . . . . ? 
C13 C11 C12 O1 105.31(13) . . . . ? 
C10 C11 C12 O1 -75.81(13) . . . . ? 
C13 C11 C12 C2 -131.64(12) . . . . ? 
C10 C11 C12 C2 47.24(14) . . . . ? 
C3 C2 C12 O1 -172.71(10) . . . . ? 
C1 C2 C12 O1 66.25(13) . . . . ? 
C3 C2 C12 C11 66.58(13) . . . . ? 
C1 C2 C12 C11 -54.46(13) . . . . ? 
C21 C14 C15 C16 -62.09(13) . . . . ? 
C22 C14 C15 C16 48.06(14) . . . . ? 
C21 C14 C15 C25 58.86(13) . . . . ? 
C22 C14 C15 C25 169.01(10) . . . . ? 
C14 C15 C16 C17 22.75(18) . . . . ? 
C25 C15 C16 C17 -98.13(15) . . . . ? 
C15 C16 C17 C18 0.1(2) . . . . ? 
C16 C17 C18 C21 15.52(19) . . . . ? 
C16 C17 C18 C19 -79.99(17) . . . . ? 
C17 C18 C19 C22 49.37(15) . . . . ? 
C21 C18 C19 C22 -67.06(10) . . . . ? 
C17 C18 C19 C20 149.85(11) . . . . ? 
C21 C18 C19 C20 33.42(9) . . . . ? 
C22 C19 C20 O4 179.30(10) . . . . ? 
C18 C19 C20 O4 78.06(11) . . . . ? 
C22 C19 C20 C21 67.35(10) . . . . ? 
C18 C19 C20 C21 -33.88(9) . . . . ? 
O4 C20 C21 C23 50.27(16) . . . . ? 
C19 C20 C21 C23 165.09(12) . . . . ? 
O4 C20 C21 C14 -179.70(10) . . . . ? 
C19 C20 C21 C14 -64.88(10) . . . . ? 
O4 C20 C21 C18 -80.61(12) . . . . ? 
C19 C20 C21 C18 34.21(9) . . . . ? 
C15 C14 C21 C23 -61.57(13) . . . . ? 
C22 C14 C21 C23 177.79(11) . . . . ? 
C15 C14 C21 C20 161.51(10) . . . . ? 
C22 C14 C21 C20 40.87(12) . . . . ? 
C15 C14 C21 C18 72.35(11) . . . . ? 
C22 C14 C21 C18 -48.28(11) . . . . ? 
C17 C18 C21 C23 77.03(15) . . . . ? 
C19 C18 C21 C23 -164.98(12) . . . . ? 
C17 C18 C21 C20 -151.63(11) . . . . ? 
C19 C18 C21 C20 -33.64(9) . . . . ? 
C17 C18 C21 C14 -49.68(13) . . . . ? 
C19 C18 C21 C14 68.32(10) . . . . ? 
C20 C19 C22 C14 -46.51(12) . . . . ? 
C18 C19 C22 C14 41.97(12) . . . . ? 
C15 C14 C22 C19 -111.53(12) . . . . ? 
C21 C14 C22 C19 3.41(12) . . . . ? 
C20 C21 C23 C24 -178.69(11) . . . . ? 
C14 C21 C23 C24 55.81(14) . . . . ? 
C18 C21 C23 C24 -64.83(15) . . . . ? 
C21 C23 C24 C26 126.83(14) . . . . ? 
C21 C23 C24 C25 -50.36(14) . . . . ? 
C26 C24 C25 O3 113.38(14) . . . . ? 
C23 C24 C25 O3 -69.36(13) . . . . ? 
C26 C24 C25 C15 -126.15(13) . . . . ? 
C23 C24 C25 C15 51.11(14) . . . . ? 
C16 C15 C25 O3 -174.16(10) . . . . ? 
C14 C15 C25 O3 65.27(13) . . . . ? 
C16 C15 C25 C24 65.99(13) . . . . ? 
C14 C15 C25 C24 -54.58(14) . . . . ? 
  
_diffrn_measured_fraction_theta_max    0.987 
_diffrn_reflns_theta_full              28.30 
_diffrn_measured_fraction_theta_full   0.990 
_refine_diff_density_max    0.365 
_refine_diff_density_min   -0.244 
_refine_diff_density_rms    0.048 

#===END
